# Supplementary material
Source: ML conference proceedings conference paper supplement (https://proceedings.mlr.press/v97/chang19a.html)
Supplement: Supplementary file [file chang19a-supp.pdf]

## A. MIMIC3 Preprocessing for Survival Forecasting

We use the publicly available dataset MIMIC3 (Johnson et al., 2016) and then follow the preprocessing of Harutyunyan et al. (2017) for the in-hospital mortality prediction task. It excludes the neonatal and pediatric patients and patients with multiple ICU stays. The training set consists of 35,725 patients with 10.81% mortality rate, and test set has 6,294 patients with 9.94% mortality rate. We then split 15% of our training set as our validation set.

For classifier training, we uniformly take 6 timepoints within the last 24 hours of each patient trajectory. For each prediction point, we set the label as 1 if the patient die in the encounter and 0 otherwise. For each patient, we evaluate on a uniformly spaced grid points with separation of 3 hours starting backward from the patient’s last time until the maximum 24 hours, resulting in maximum 7 points per patient. We only include the prediction points with at least 3 hours of history and 5 measurement values. The ultimate goal is to predict whether patient dies within 24 hours given the past 24 hours of observations.

For RL, we take the last 24 hours of each dying patient and discretize it into 30 minutes interval. We only include the patients with at least 12 hours to remove unstable trajectories. Note that we set the RL trajectory and classifier prediction horizon as the last 24 hours of the patient. This could avoid the label confounding problem (Paxton et al., 2013) as there might be unrecorded intervention that increase patient’s health condition and change the label.

We select 38 static demographic features and clinical. Age, Gender, Ethnicity, congestive heart failure, cardiac arrhythmias, valvular disease, pulmonary circulation, peripheral vascular, hypertension, paralysis, other neurological, chronic pulmonary, diabetes uncomplicated, diabetes complicated, hypothyroidism, renal failure, liver disease, peptic ulcer, aids, lymphoma, metastatic cancer, solid tumor, rheumatoid arthritis, coagulopathy, obesity, weight loss, fluid electrolyte, blood loss anemia, deficiency anemias, alcohol abuse, drug abuse, psychoses, depression. The features are curated from the official MIMIC repository<sup>1</sup> with the comorbidity concept.

We show the feature choices and their count in Appendix Table 2. We select 39 time-series measurements with counts at least 1% of the count of heart rate, which is the largest count of the measurement in our data. We further log-transform, remove outliers outside of 2 inter-quantile regions (IRQ), and standardize time series measurement values for zero-mean unit-variance for each feature.

<sup>1</sup><https://github.com/MIT-LCP/mimic-code/tree/master/concepts>

## B. Classifier Training Details and Performances

We train the RNN as follows. We use LSTM with 1 hidden layer of 32 nodes. We regularize the neural network with  $\lambda = 1e-5$  as  $\ell_2$  regularization and dropout rate of 0.3 for input and output layer, and 0.5 for the hidden layer. We use mean imputation (set the missing value as the feature mean) for the time-series features, and add missingness indicators for each feature (Lipton et al.). We discretize the time series into 1-hour interval and take average value if there are multiple measurements per interval. The RNN takes these 1-hour discretized grid point for up to 24 hours time point to classify. We train two other baselines: Logistic Regression (LR) with  $\ell_2$  regularization as  $\lambda = 1e-5$  (selected by cross validation), and Random Forest (RF) with 500 trees. We concatenate all the features, as long as missingness indicators across all the time points, resulting in  $24 * (39 * 2) + 38 = 1910$  features. We also use mean imputation for these features.

*Table 2.* Time variant features and their counts after preprocessing

| Feature                            | Count   | Relative Count % |
|------------------------------------|---------|------------------|
| Anion gap                          | 213442  | 0.051            |
| Bicarbonate                        | 219802  | 0.052            |
| Blood urea nitrogen                | 220854  | 0.053            |
| Calcium (total)                    | 185718  | 0.044            |
| Chloride (blood)                   | 225476  | 0.054            |
| Creatine kinase                    | 44459   | 0.011            |
| Creatinine (blood)                 | 221715  | 0.053            |
| Diastolic blood pressure           | 3929745 | 0.935            |
| Glasgow coma scale total           | 627577  | 0.149            |
| Glucose (blood)                    | 313798  | 0.075            |
| Heart Rate                         | 4204926 | 1.0              |
| Hematocrit                         | 253045  | 0.06             |
| Hemoglobin                         | 196859  | 0.047            |
| Magnesium                          | 218030  | 0.052            |
| Mean blood pressure                | 3904218 | 0.928            |
| Mean corpuscular hemoglobin        | 194995  | 0.046            |
| Phosphate                          | 189261  | 0.045            |
| Platelets                          | 205492  | 0.049            |
| Potassium                          | 241110  | 0.057            |
| Prothrombin time                   | 139231  | 0.033            |
| Red blood cell count (blood)       | 194997  | 0.046            |
| Sodium                             | 229893  | 0.055            |
| Systolic blood pressure            | 3930865 | 0.935            |
| Temperature (C)                    | 797435  | 0.19             |
| White blood cell count (blood)     | 196268  | 0.047            |
| CO2 (ETCO2, PCO2, etc.)            | 263161  | 0.063            |
| Oxygen saturation                  | 101518  | 0.024            |
| Partial pressure of carbon dioxide | 263153  | 0.063            |
| Partial thromboplastin time        | 149675  | 0.036            |
| pH (blood)                         | 285076  | 0.068            |
| Bilirubin (total)                  | 47707   | 0.011            |
| Lactate                            | 84510   | 0.02             |
| Lactic acid                        | 89347   | 0.021            |
| Positive end-expiratory pressure   | 53689   | 0.013            |
| Fraction inspired oxygen           | 375335  | 0.089            |
| Calcium ionized                    | 140283  | 0.033            |
| Alanine aminotransferase           | 46850   | 0.011            |
| Alkaline phosphate                 | 45809   | 0.011            |
| Asparate aminotransferase          | 46808   | 0.011            |

---

Table 3. Relative action frequency of physician policy in 24h mortality forecasting task

| Feature                            | Relative action frequency |
|------------------------------------|---------------------------|
| Anion gap                          | 0.0021                    |
| Bicarbonate                        | 0.0118                    |
| Blood urea nitrogen                | 0.0022                    |
| Calcium (total)                    | 0.0120                    |
| Chloride (blood)                   | 0.0022                    |
| Creatine kinase                    | 0.0122                    |
| Creatinine (blood)                 | 0.0059                    |
| Diastolic blood pressure           | 0.0101                    |
| Glascow coma scale total           | 0.0046                    |
| Glucose (blood)                    | 0.0125                    |
| Heart Rate                         | 0.0022                    |
| Hematocrit                         | 0.0123                    |
| Hemoglobin                         | 0.0642                    |
| Magnesium                          | 0.0029                    |
| Mean blood pressure                | 0.0085                    |
| Mean corpuscular hemoglobin        | 0.0148                    |
| Phosphate                          | 0.0662                    |
| Platelets                          | 0.0143                    |
| Potassium                          | 0.0112                    |
| Prothrombin time                   | 0.0023                    |
| Red blood cell count (blood)       | 0.0024                    |
| Sodium                             | 0.0122                    |
| Systolic blood pressure            | 0.0635                    |
| Temperature (C)                    | 0.0111                    |
| White blood cell count (blood)     | 0.0029                    |
| CO2 (ETCO2, PCO2, etc.)            | 0.0059                    |
| Oxygen saturation                  | 0.0073                    |
| Partial pressure of carbon dioxide | 0.0103                    |
| Partial thromboplastin time        | 0.0116                    |
| pH (blood)                         | 0.0009                    |
| Bilirubin (total)                  | 0.0134                    |
| Lactate                            | 0.0068                    |
| Lactic acid                        | 0.0112                    |
| Positive end-expiratory pressure   | 0.0126                    |
| Fraction inspired oxygen           | 0.0643                    |
| Calcium ionized                    | 0.0133                    |
| Alanine aminotransferase           | 0.0193                    |
| Alkaline phosphate                 | 0.0112                    |
| Asparate aminotransferase          | 0.0075                    |

Table 4. Hyperameters and ranges for Dueling DQN

| Parameter                         | Range                                                                     |
|-----------------------------------|---------------------------------------------------------------------------|
| Num. of representation layers     | {1, 2, 3, 4}                                                              |
| Num. of dueling layers            | {1, 2, 3, 4}                                                              |
| Dim. of NN layers                 | {16, 32, 64, 128}                                                         |
| Learning rate                     | { $5e-2$ , $1e-3$ , $5e-3$ , $1e-4$ , $5e-4$ , $1e-5$ , $5e-5$ , $1e-6$ } |
| L2 reg. constant                  | { $5e-1$ , $1e-1$ , $5e-2$ , $1e-2$ , $5e-3$ , $1e-3$ , $5e-4$ , $1e-4$ } |
| Dropout keep prob.                | {1.0, 0.9, 0.8, 0.7, 0.6, 0.5}                                            |
| Training batch size               | {32, 64, 128, 256, 512}                                                   |
| Action cost coefficient $\lambda$ | { $1e-4$ , $5e-4$ , $1e-3$ , $5e-3$ , $1e-2$ }                            |

Table 5. Hyperameters and ranges for information gain estimator in OPPE

| Parameter                     | Range                                                   | The best model |
|-------------------------------|---------------------------------------------------------|----------------|
| Num. of representation layers | {1, 2, 3, 4}                                            | 1              |
| Dim. of NN layers             | {16, 32, 64, 128, 256, 512}                             | 64             |
| Learning rate                 | { $1e-2$ , $1e-3$ , $1e-4$ , $1e-5$ , $1e-6$ , $1e-7$ } | $1e-3$         |
| L2 reg. constant              | { $1e-2$ , $1e-3$ , $1e-4$ , $1e-5$ , $1e-6$ , $1e-7$ } | $1e-4$         |
| Dropout keep prob.            | {1.0, 0.9, 0.8, 0.7, 0.6, 0.5}                          | 0.7            |
| Training batch size.          | {64, 128, 256, 512, 1024}                               | 64             |
